# Supplementary material for: Synthesis and characterization of a new ZIF-67@MgAl2O4 nanocomposite and its adsorption behaviour
Source: Royal Society of Chemistry journal article supplement (doi:10.1039/d1ra01056e), 2021-01-01
Supplement: d1ra01056e1.pdf [file d1ra01056e1.pdf]

## **Supporting information**

### **Synthesis and characterization of a new ZIF-67@MgAl<sub>2</sub>O<sub>4</sub> composite and its adsorption behaviour**

*Mehdi Davoodi<sup>a</sup>, Fatemeh Davar<sup>a,\*</sup>, Mohammad R. Rezayat<sup>a</sup>, Mohammad T. Jafari<sup>a</sup>,*

*Mehdi Bazarganipour, and Ahmed Esmail Shalan<sup>b, c,\*,+</sup>*

<sup>a</sup> Department of Chemistry, Isfahan University of Technology, Isfahan, 84156-83111, Iran

<sup>b</sup> BCMaterials, Basque Center for Materials, Applications and Nanostructures, Martina Casiano, UPV/EHU Science Park, Barrio Sarriena s/n, Leioa 48940, Spain.

<sup>c</sup> Central Metallurgical Research and Development Institute (CMRDI), P.O. Box 87, Helwan, Cairo 11421, Egypt.

*\*Corresponding authors. E-mail addresses: [davar@cc.iut.ac.ir](mailto:davar@cc.iut.ac.ir) (F. Davar), [a.shalan133@gmail.com](mailto:a.shalan133@gmail.com) (A. E. Shalan).*

<sup>+</sup> Currently on leave from CMRDI

**Table S1:** The operation conditions of the CD-IMS apparatus.

| Parameter                                   | Setting                   |
|---------------------------------------------|---------------------------|
| IMS mode                                    | Positive                  |
| IMS type                                    | Drift tube                |
| Ionization source                           | Corona discharge          |
| IMS detector                                | Faraday cup               |
| Needle voltage                              | 2.0 kV                    |
| Target electrode voltage                    | 7.0 kV                    |
| Drift electric field                        | 400 V cm <sup>-1</sup>    |
| Drift gas flow (N <sub>2</sub> , 99.999%)   | 1000 mL min <sup>-1</sup> |
| Carrier gas flow (N <sub>2</sub> , 99.999%) | 800 mL min <sup>-1</sup>  |
| IMS cell temperature                        | 150 °C                    |
| Injection port temperature                  | 220 °C                    |
| Drift tube length                           | 11 cm                     |
| Shutter grid pulse                          | 180 μs                    |
| Shutter grid voltage                        | 200 V                     |
| Shutter grid frequency                      | 25 Hz                     |
| Number of IMS averages                      | 25                        |
| Number of points per ion mobility spectrum  | 500                       |

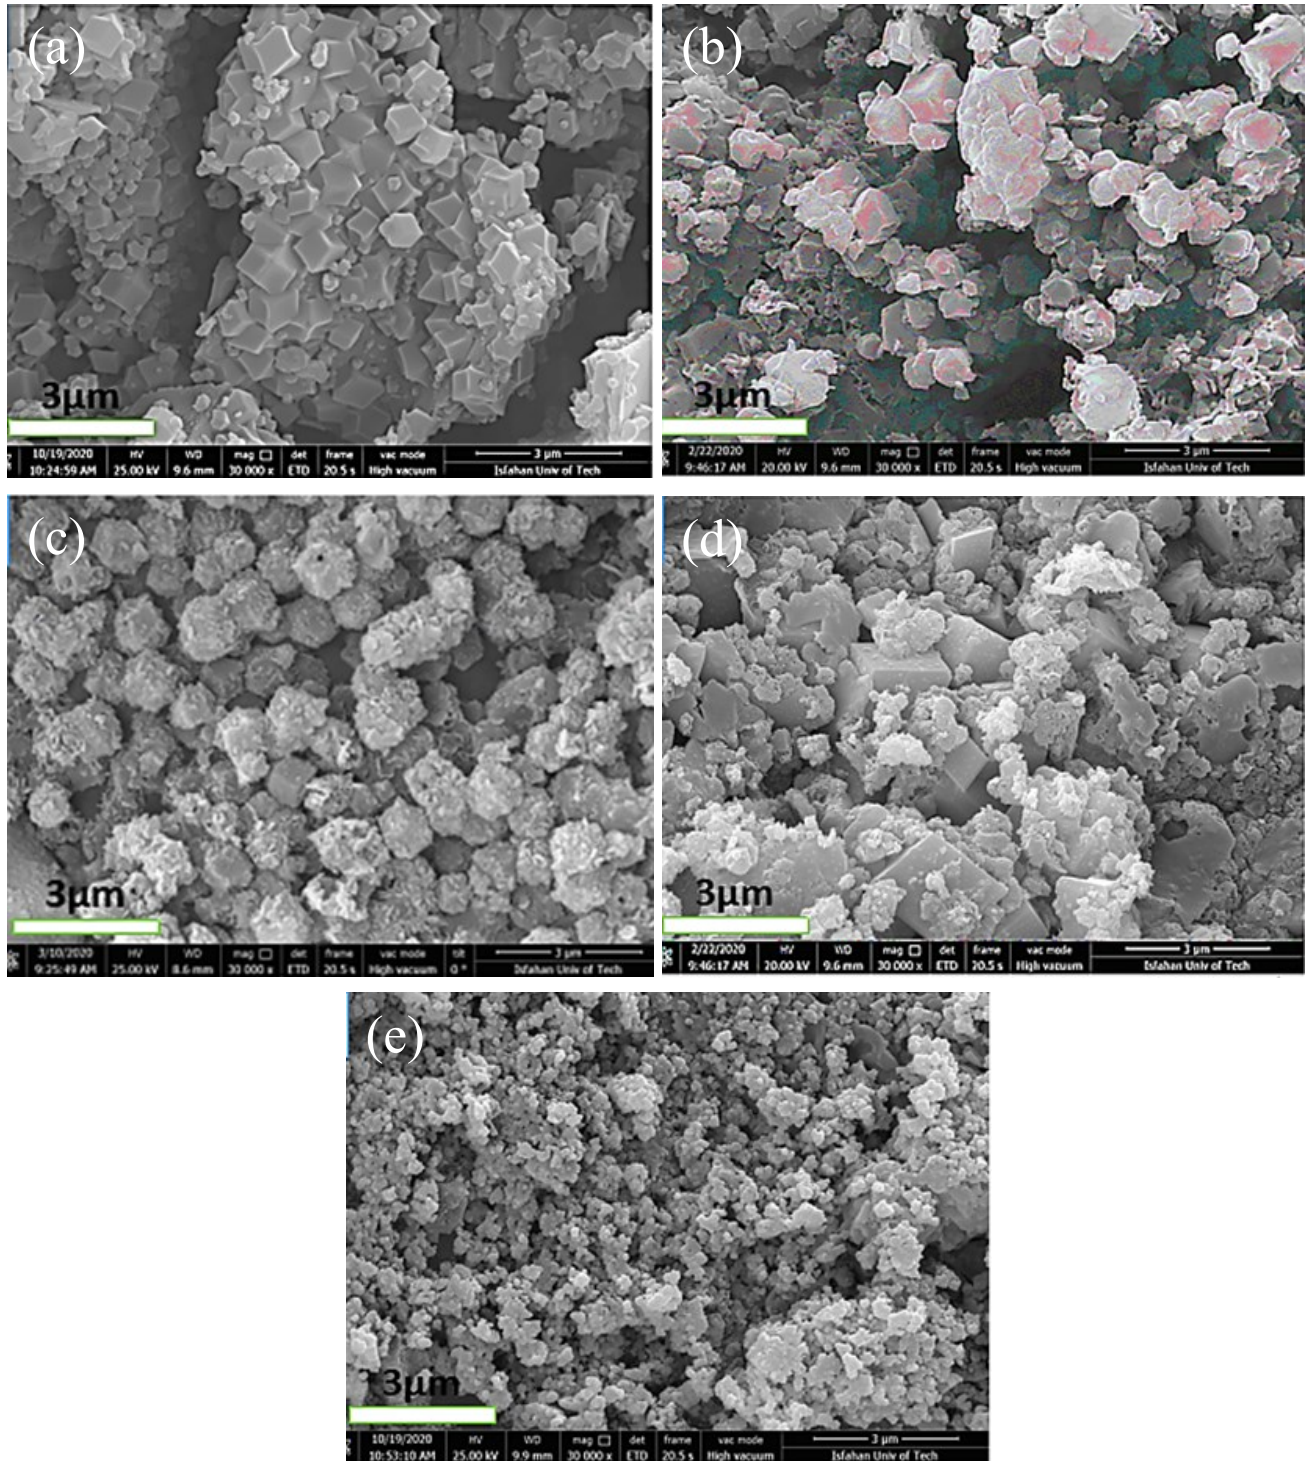

**Figure S1:** FE-SEM images of the synthesized composites with the magnification of 3 micrometre in the different weight ratio a)  $S_1$  sample ( $ZIF-67/MgAl_2O_4 = 8$ ), b)  $S_2$  sample ( $ZIF-67/MgAl_2O_4 = 4$ ), c)  $S_3$  sample ( $ZIF-67/MgAl_2O_4 = 8$ ), d)  $S_4$  sample ( $ZIF-67/MgAl_2O_4 = 8$ ), and e)  $S_5$  sample ( $ZIF-67/MgAl_2O_4 = 8$ ).

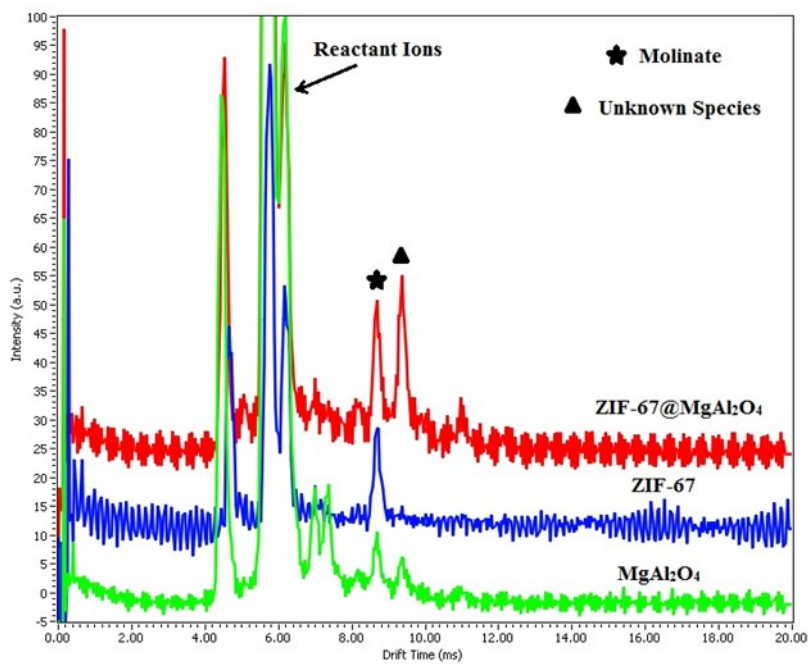

**Figure S2:** Ion mobility spectra of the molinate extracted by MgAl<sub>2</sub>O<sub>4</sub>, ZIF-67, and ZIF-67@MgAl<sub>2</sub>O<sub>4</sub>, (sample volume, 10 mL; molinate concentration; 50 μg L<sup>-1</sup>).
